# Supplementary material
Source: Springer Nature journal article supplement (https://www.springermedizin.de/resource/supplementary/12963_2012_212_MOESM9_ESM.pdf/9572402)

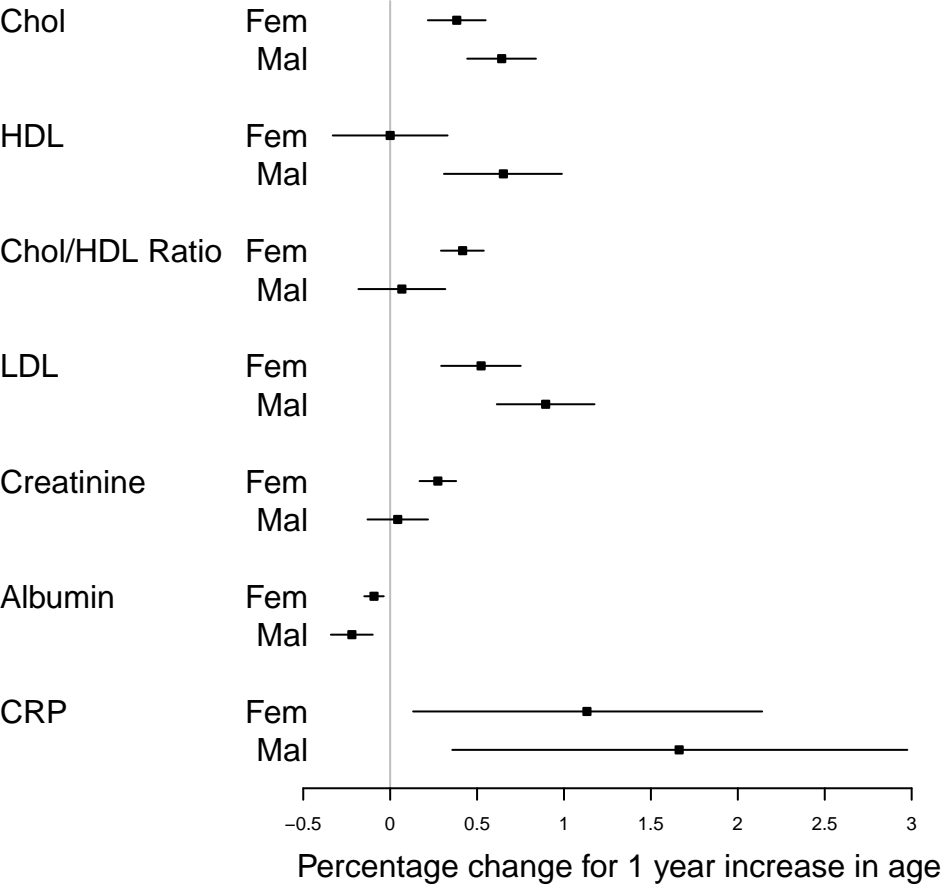

Supplement: MOESM9 [file 9572402]
